# Supplementary material for: Single-cell Transcriptome Mapping Identifies Common and Cell-type Specific Genes Affected by Acute Delta9-tetrahydrocannabinol in Humans
Source: Sci Rep. 2020 Feb 26;10:3450. doi: 10.1038/s41598-020-59827-1 (PMC7044203; doi:10.1038/s41598-020-59827-1)
Supplement: Supplementary file 2 — Supplementary tables. [file 41598_2020_59827_MOESM2_ESM.xlsx]

## Sheet: List of Contents
Supplementary tables
Table S1. Cell markers for cell type identification
Table S2. Mapping cell types using generalized linear modelling
Table S3. Proportion of cell numbers for each sample in a given cell type
Table S4. A summary of the number of differentially expressed genes between post- and pre-THC samples in each cell type
Table S5. Differentially expressed genes affacted by THC in CD4+ T-cells
Table S6. Differentially expressed genes affacted by THC in IL7RCD4+ T-cells
Table S7. Differentially expressed genes affacted by THC in CD8+ T-cells
Table S8. Differentially expressed genes affacted by THC in B cells
Table S9. Differentially expressed genes affacted by THC in natural killer cells
Table S10. Differentially expressed genes affacted by THC in CD14+ monocytes
Table S11. Differentially expressed genes affacted by THC in FCGR3A monocytes
Table S12. Top 30 bioinformatically inferred causal analysis for 294 THC-associated genes
Table S13. log2 fold change of top 20 genes between post- and pre-THC infusion in each CD4+ T-cell clusters
Table S14. log2 fold change of top 20 genes between post- and pre-THC infusion in each CD8+ T-cell clusters
Table S15. log2 fold change of top 20 genes between post- and pre-THC infusion in each B cell clusters
Table S16. log2 fold change of top 20 genes between post- and pre-THC infusion in each CD14+ monocytes clusters
Table S17. Gene Ontology (GO) term enrichment for the co-expression network in CD4+ T-cells
Table S18. Gene Ontology (GO) term enrichment for the co-expression network in CD8+ T-cells
Table S19. Gene Ontology (GO) term enrichment for the co-expression network in B cells
Table S20. Gene Ontology (GO) term enrichment for the co-expression network in natural killer cells
Table S21. Gene Ontology (GO) term enrichment for the co-expression network in CD14+ monocytes
Table S22. Gene Ontology (GO) term enrichment for the co-expression network in FCGR3A monocytes
Table S23. A summary of the number of significant pathway in each cell type
Table S24. Significant pathways from KEGG in CD4+ T-cells
Table S25. Significant pathways from KEGG in IL7RCD4+ T-cells
Table S26. Significant pathways from KEGG in CD8+ T-cells
Table S27. Significant pathways from KEGG in B cells
Table S28. Significant pathways from KEGG in natural killer cells
Table S29. Significant pathways from KEGG in CD14+ monocytes
Table S30. Significant pathways from KEGG in FCGR3A monocytes
Table S31. Pre-THC gene co-expression between CNR2 and other genes
Table S32. Post-THC gene co-expression between CNR2 and other genes
Table S33. Physiological and psychological variables pre- and post-THC infusion for two participants

## Sheet: Table S1
Table S1. Cell markers for cell type identification
Cell types	Cell markers
CD4+ T cells	IL7R	CD3D	CD4	CTLA4
IL7RCD4+ T Cells	CD8A	IL7R	CD3D
CD8+ T cells	CD8A	GZMB	CD3D	CD8B
B cells	CD19	MS4A1	CD79A	CD79B	BLNK
Natural Killer cells	FCGR3A	NCAM1	KLRB1	KLRC1	KLRD1	KLRF1	GNLY	NKG7
CD14+ monocytes	CD14	LYZ
Dendratic cells	IL3RA	CLEC4C	NRP1	FCER1A	CST3
FCGR3A monocytes	FCGR3A	MS4A7

## Sheet: Table S2
Table S2. Mapping cell types using generalized linear modelling
Cluster Name	CD4+ T-cells	IL7RCD4+ T-Cells	CD8+ T-cells	B cell	Natural Killer Cells	CD14+ monocytes	FCGR3A monocytes	Dendritic cells
clu1 (n=149)	0.671141	2.68456	4.02685	0	40.9396	0	0	0
clu2 (n=16)	0	0	0	0	0	6.25	0	6.25
clu3 (n=2242)	21.4095	17.2168	1.78412	0.044603	0.579839	0.0892061	0.044603	0
clu4 (n=1348)	4.74777	37.3145	36.276	0	0.074184	0.222552	0	0
clu5 (n=1970)	0	0	0	0	52.2843	0	0	0
clu6 (n=92)	1.08696	1.08696	1.08696	35.8696	13.0435	0	0	0
clu7 (n=938)	0.319829	1.81237	0.21322	0	23.774	0	0	0
clu8 (n=1209)	25.641	20.5955	2.31596	0.165426	0.330852	0.496278	0.082713	0
clu9 (n=616)	0	0	0	0.162338	0.974026	12.987	45.1299	0
clu10 (n=1171)	0	0	0	0.256191	0.341588	28.608	0.256191	0
clu11 (n=43)	0	0	6.97674	0	0	2.32558	0	0
clu12 (n=844)	0	0	0	16.8246	0	0	0	0
clu13 (n=23)	13.0435	8.69565	4.34783	0	4.34783	4.34783	0	0
clu14 (n=1173)	0	0	0	20.9719	0	0.0852515	0	0
clu15 (n=1)	0	0	0	0	0	0	0	0
clu16 (n=1940)	29.3299	24.3814	4.89691	0	0.412371	0.309278	0.103093	0
clu17 (n=424)	0	0	0	0	0	21.934	1.88679	0
clu18 (n=1084)	0	0.553506	16.6974	0	15.7749	0	0	0
clu19 (n=89)	22.4719	40.4494	8.98876	0	0	0	0	0
clu20 (n=464)	0.862069	9.05172	18.1034	0	1.93966	0.215517	0	0
clu21 (n=137)	0	0.729927	21.8978	0	1.45985	0	0	0
Note: Final cell type is defined by the highest percentage of significant cells in each cluster and cell markers

## Sheet: Table S3
Table S3. Proportion of cell numbers for each sample in a given cell type
	CD4+ T-cells		IL7RCD4+ T-cells		CD8+ T-cells		B cells		Natural Killer cells		CD14+ monocytes		FCGR3A monocytes		Dendritic cells		Total
	n	%	n	%	n	%	n	%	n	%	n	%	n	%	n	%
Pre-THC-S1	1928	0.349275	495	0.367211	468	0.168831	936	0.443812	380	0.192893	616	0.386207	108	0.175325	18	0.418605
Post-THC-S1	1137	0.205978	305	0.226261	530	0.191198	596	0.282598	939	0.47665	368	0.230721	274	0.444805	7	0.162791
Pre-THC-S2	1109	0.200906	215	0.159496	911	0.328644	254	0.120436	387	0.196447	454	0.284639	186	0.301948	15	0.348837
Post-THC-S2	1346	0.243841	333	0.247033	863	0.311328	323	0.153153	264	0.13401	157	0.0984326	48	0.0779221	3	0.0697674
Total	5520		1348		2772		2109		1970		1595		616		43		15973
Cell type percentage	0.345583		0.0843924		0.173543		0.132035		0.123333		0.099856		0.0385651		0.00269204

## Sheet: Table S4
Table S4. A summary of the number of differentially expressed genes between post- and pre-THC samples in each cell type
Ensembl ID	Gene	CD4+ T-cells	IL7RCD4+ T-cells	CD8+ T-cells	B cells	NK Cells	CD14+ monocytes	Sum of DE cell types
ENSG00000163220	S100A9	1	1	1	1	1	1	6
ENSG00000211592	IGKC	1	1	1	0	1	1	5
ENSG00000133639	BTG1	1	1	1	0	1	1	5
ENSG00000211677	IGLC2	1	1	1	0	1	1	5
ENSG00000168209	DDIT4	1	1	1	1	1	0	5
ENSG00000143546	S100A8	1	1	1	1	1	0	5
ENSG00000275302	CCL4	1	0	1	1	1	1	5
ENSG00000205542	TMSB4X	1	1	1	1	0	1	5
ENSG00000171223	JUNB	0	0	1	1	1	1	4
ENSG00000198786	MT-ND5	1	1	1	0	1	0	4
ENSG00000115738	ID2	1	1	1	0	1	0	4
ENSG00000136490	LIMD2	1	1	1	0	1	0	4
ENSG00000152518	ZFP36L2	1	0	1	1	1	0	4
ENSG00000100453	GZMB	1	0	0	1	1	1	4
ENSG00000100650	SRSF5	1	1	1	1	0	0	4
ENSG00000175567	UCP2	1	1	1	1	0	0	4
ENSG00000115523	GNLY	1	1	0	1	0	1	4
ENSG00000105374	NKG7	1	1	0	1	0	1	4
ENSG00000162894	FCMR	0	1	1	1	0	0	3
ENSG00000177606	JUN	1	1	0	0	1	0	3
ENSG00000198938	MT-CO3	1	0	1	0	1	0	3
ENSG00000133574	GIMAP4	1	1	1	0	0	0	3
ENSG00000171858	RPS21	1	1	1	0	0	0	3
ENSG00000229117	RPL41	1	1	1	0	0	0	3
ENSG00000034510	TMSB10	1	1	0	1	0	0	3
ENSG00000163041	H3F3A	1	1	0	1	0	0	3
ENSG00000265972	TXNIP	1	1	0	1	0	0	3
ENSG00000090382	LYZ	1	0	1	0	0	1	3
ENSG00000128016	ZFP36	0	0	1	0	1	0	2
ENSG00000198763	MT-ND2	0	0	1	0	1	0	2
ENSG00000026508	CD44	0	0	0	0	1	1	2
ENSG00000187514	PTMA	0	0	0	1	1	0	2
ENSG00000204264	PSMB8	0	1	0	1	0	0	2
ENSG00000157514	TSC22D3	0	0	1	0	0	1	2
ENSG00000272047	GTF2H5	0	0	1	1	0	0	2
ENSG00000206503	HLA-A	0	0	1	1	0	0	2
ENSG00000135046	ANXA1	0	0	0	1	0	1	2
ENSG00000232629	HLA-DQB2	0	0	0	1	0	1	2
ENSG00000272256	RP11-489E7.4	1	0	0	0	1	0	2
ENSG00000067082	KLF6	1	0	0	0	1	0	2
ENSG00000173812	EIF1	1	1	0	0	0	0	2
ENSG00000136997	MYC	1	1	0	0	0	0	2
ENSG00000071073	MGAT4A	1	1	0	0	0	0	2
ENSG00000126353	CCR7	1	1	0	0	0	0	2
ENSG00000118503	TNFAIP3	1	1	0	0	0	0	2
ENSG00000157978	LDLRAP1	1	1	0	0	0	0	2
ENSG00000241343	RPL36A	1	0	1	0	0	0	2
ENSG00000057657	PRDM1	1	0	1	0	0	0	2
ENSG00000219200	RNASEK	1	0	1	0	0	0	2
ENSG00000133321	RARRES3	1	0	1	0	0	0	2
ENSG00000085265	FCN1	1	0	1	0	0	0	2
ENSG00000257764	RP11-1143G9.4	1	0	1	0	0	0	2
ENSG00000198712	MT-CO2	1	0	1	0	0	0	2
ENSG00000142327	RNPEPL1	1	0	1	0	0	0	2
ENSG00000127528	KLF2	1	0	1	0	0	0	2
ENSG00000067225	PKM	1	0	1	0	0	0	2
ENSG00000211772	TRBC2	1	0	1	0	0	0	2
ENSG00000277734	TRAC	1	0	0	0	0	1	2
ENSG00000130522	JUND	1	0	0	0	0	1	2
ENSG00000134333	LDHA	1	0	0	0	0	1	2
ENSG00000100097	LGALS1	1	0	0	0	0	1	2
ENSG00000116679	IVNS1ABP	1	0	0	0	0	1	2
ENSG00000125910	S1PR4	1	0	0	1	0	0	2
ENSG00000101608	MYL12A	1	0	0	1	0	0	2
ENSG00000109906	ZBTB16	1	0	0	1	0	0	2
ENSG00000268001	CARD8-AS1	1	0	0	1	0	0	2
ENSG00000137441	FGFBP2	1	0	0	1	0	0	2
ENSG00000204261	PSMB8-AS1	1	0	0	1	0	0	2
ENSG00000182899	RPL35A	1	0	0	1	0	0	2
ENSG00000173113	TRMT112	1	0	0	1	0	0	2
ENSG00000211896	IGHG1	1	0	1	0	0	0	2
ENSG00000175040	CHST2	0	0	0	0	1	0	1
ENSG00000087074	PPP1R15A	0	0	0	0	1	0	1
ENSG00000172543	CTSW	0	0	0	0	1	0	1
ENSG00000163466	ARPC2	0	0	0	0	1	0	1
ENSG00000181036	FCRL6	0	0	0	0	1	0	1
ENSG00000143119	CD53	0	0	0	0	1	0	1
ENSG00000138767	CNOT6L	0	0	0	0	1	0	1
ENSG00000172331	BPGM	0	0	0	0	1	0	1
ENSG00000172216	CEBPB	0	0	0	0	1	0	1
ENSG00000095794	CREM	0	0	0	0	1	0	1
ENSG00000160932	LY6E	0	0	0	0	1	0	1
ENSG00000197746	PSAP	0	0	0	0	1	0	1
ENSG00000096384	HSP90AB1	0	0	0	0	1	0	1
ENSG00000273338	RP11-386I14.4	0	1	0	0	0	0	1
ENSG00000183291	SEP15	0	1	0	0	0	0	1
ENSG00000265681	RPL17	0	1	0	0	0	0	1
ENSG00000143811	PYCR2	0	1	0	0	0	0	1
ENSG00000173221	GLRX	0	1	0	0	0	0	1
ENSG00000138795	LEF1	0	1	0	0	0	0	1
ENSG00000159720	ATP6V0D1	0	1	0	0	0	0	1
ENSG00000108654	DDX5	0	1	0	0	0	0	1
ENSG00000173114	LRRN3	0	1	0	0	0	0	1
ENSG00000213203	GIMAP1	0	1	0	0	0	0	1
ENSG00000140092	FBLN5	0	1	0	0	0	0	1
ENSG00000054282	SDCCAG8	0	1	0	0	0	0	1
ENSG00000121966	CXCR4	0	0	1	0	0	0	1
ENSG00000125347	IRF1	0	0	1	0	0	0	1
ENSG00000266402	SNHG25	0	0	1	0	0	0	1
ENSG00000008517	IL32	0	0	1	0	0	0	1
ENSG00000144426	NBEAL1	0	0	1	0	0	0	1
ENSG00000213741	RPS29	0	0	1	0	0	0	1
ENSG00000170345	FOS	0	0	1	0	0	0	1
ENSG00000272009	RP1-313I6.12	0	0	1	0	0	0	1
ENSG00000118680	MYL12B	0	0	1	0	0	0	1
ENSG00000185338	SOCS1	0	0	1	0	0	0	1
ENSG00000102879	CORO1A	0	0	1	0	0	0	1
ENSG00000183918	SH2D1A	0	0	1	0	0	0	1
ENSG00000180389	ATP5EP2	0	0	1	0	0	0	1
ENSG00000026025	VIM	0	0	1	0	0	0	1
ENSG00000177954	RPS27	0	0	1	0	0	0	1
ENSG00000151500	THYN1	0	0	1	0	0	0	1
ENSG00000112081	SRSF3	0	0	1	0	0	0	1
ENSG00000169733	RFNG	0	0	1	0	0	0	1
ENSG00000143384	MCL1	0	0	0	0	0	1	1
ENSG00000125740	FOSB	0	0	0	0	0	1	1
ENSG00000179820	MYADM	0	0	0	0	0	1	1
ENSG00000196352	CD55	0	0	0	0	0	1	1
ENSG00000155307	SAMSN1	0	0	0	0	0	1	1
ENSG00000163171	CDC42EP3	0	0	0	0	0	1	1
ENSG00000105835	NAMPT	0	0	0	0	0	1	1
ENSG00000185905	C16orf54	0	0	0	0	0	1	1
ENSG00000185950	IRS2	0	0	0	0	0	1	1
ENSG00000198355	PIM3	0	0	0	0	0	1	1
ENSG00000122862	SRGN	0	0	0	0	0	1	1
ENSG00000120738	EGR1	0	0	0	0	0	1	1
ENSG00000106546	AHR	0	0	0	0	0	1	1
ENSG00000171988	JMJD1C	0	0	0	0	0	1	1
ENSG00000100644	HIF1A	0	0	0	0	0	1	1
ENSG00000160888	IER2	0	0	0	0	0	1	1
ENSG00000152804	HHEX	0	0	0	0	0	1	1
ENSG00000126264	HCST	0	0	0	0	0	1	1
ENSG00000081320	STK17B	0	0	0	0	0	1	1
ENSG00000221869	CEBPD	0	0	0	0	0	1	1
ENSG00000166710	B2M	0	0	0	0	0	1	1
ENSG00000131759	RARA	0	0	0	0	0	1	1
ENSG00000204577	LILRB3	0	0	0	0	0	1	1
ENSG00000115875	SRSF7	0	0	0	0	0	1	1
ENSG00000267519	CTD-3252C9.4	0	0	0	0	0	1	1
ENSG00000173762	CD7	0	0	0	0	0	1	1
ENSG00000124831	LRRFIP1	0	0	0	0	0	1	1
ENSG00000136826	KLF4	0	0	0	0	0	1	1
ENSG00000113504	SLC12A7	0	0	0	0	0	1	1
ENSG00000274536	RP6-159A1.4	0	0	0	0	0	1	1
ENSG00000156675	RAB11FIP1	0	0	0	0	0	1	1
ENSG00000185187	SIGIRR	0	0	0	0	0	1	1
ENSG00000244879	GABPB1-AS1	0	0	0	0	0	1	1
ENSG00000087903	RFX2	0	0	0	0	0	1	1
ENSG00000186469	GNG2	0	0	0	0	0	1	1
ENSG00000156261	CCT8	0	0	0	0	0	1	1
ENSG00000075624	ACTB	0	0	0	0	0	1	1
ENSG00000171051	FPR1	0	0	0	0	0	1	1
ENSG00000196735	HLA-DQA1	0	0	0	1	0	0	1
ENSG00000128218	VPREB3	0	0	0	1	0	0	1
ENSG00000112149	CD83	0	0	0	1	0	0	1
ENSG00000143933	CALM2	0	0	0	1	0	0	1
ENSG00000079950	STX7	0	0	0	1	0	0	1
ENSG00000113732	ATP6V0E1	0	0	0	1	0	0	1
ENSG00000120129	DUSP1	0	0	0	1	0	0	1
ENSG00000198840	MT-ND3	0	0	0	1	0	0	1
ENSG00000111679	PTPN6	0	0	0	1	0	0	1
ENSG00000168288	MMADHC	0	0	0	1	0	0	1
ENSG00000217128	FNIP1	0	0	0	1	0	0	1
ENSG00000112576	CCND3	0	0	0	1	0	0	1
ENSG00000115541	HSPE1	0	0	0	1	0	0	1
ENSG00000168291	PDHB	0	0	0	1	0	0	1
ENSG00000090266	NDUFB2	0	0	0	1	0	0	1
ENSG00000198408	MGEA5	0	0	0	1	0	0	1
ENSG00000143612	C1orf43	0	0	0	1	0	0	1
ENSG00000130348	QRSL1	0	0	0	1	0	0	1
ENSG00000144579	CTDSP1	0	0	0	1	0	0	1
ENSG00000178127	NDUFV2	0	0	0	1	0	0	1
ENSG00000152492	CCDC50	0	0	0	1	0	0	1
ENSG00000000938	FGR	0	0	0	1	0	0	1
ENSG00000177971	IMP3	0	0	0	1	0	0	1
ENSG00000129968	ABHD17A	0	0	0	1	0	0	1
ENSG00000198843	SELT	0	0	0	1	0	0	1
ENSG00000115758	ODC1	0	0	0	1	0	0	1
ENSG00000249915	PDCD6	0	0	0	1	0	0	1
ENSG00000162511	LAPTM5	0	0	0	1	0	0	1
ENSG00000136527	TRA2B	0	0	0	1	0	0	1
ENSG00000175197	DDIT3	0	0	0	1	0	0	1
ENSG00000172172	MRPL13	0	0	0	1	0	0	1
ENSG00000082515	MRPL22	0	0	0	1	0	0	1
ENSG00000145416	43525	0	0	0	1	0	0	1
ENSG00000156304	SCAF4	0	0	0	1	0	0	1
ENSG00000120963	ZNF706	0	0	0	1	0	0	1
ENSG00000163565	IFI16	0	0	0	1	0	0	1
ENSG00000187531	SIRT7	0	0	0	1	0	0	1
ENSG00000173409	ARV1	0	0	0	1	0	0	1
ENSG00000164751	PEX2	0	0	0	1	0	0	1
ENSG00000170906	NDUFA3	0	0	0	1	0	0	1
ENSG00000156928	MALSU1	0	0	0	1	0	0	1
ENSG00000169230	PRELID1	0	0	0	1	0	0	1
ENSG00000160856	FCRL3	0	0	0	1	0	0	1
ENSG00000115091	ACTR3	0	0	0	1	0	0	1
ENSG00000185088	RPS27L	0	0	0	1	0	0	1
ENSG00000159674	SPON2	0	0	0	1	0	0	1
ENSG00000143149	ALDH9A1	0	0	0	1	0	0	1
ENSG00000211899	IGHM	0	0	0	1	0	0	1
ENSG00000100387	RBX1	0	0	0	1	0	0	1
ENSG00000101596	SMCHD1	0	0	0	1	0	0	1
ENSG00000213145	CRIP1	0	0	0	1	0	0	1
ENSG00000121858	TNFSF10	0	0	0	1	0	0	1
ENSG00000177409	SAMD9L	0	0	0	1	0	0	1
ENSG00000165650	PDZD8	0	0	0	1	0	0	1
ENSG00000272398	CD24	0	0	0	1	0	0	1
ENSG00000156976	EIF4A2	0	0	0	1	0	0	1
ENSG00000136213	CHST12	0	0	0	1	0	0	1
ENSG00000265206	RP5-1171I10.5	0	0	0	1	0	0	1
ENSG00000092330	TINF2	0	0	0	1	0	0	1
ENSG00000247982	LINC00926	0	0	0	1	0	0	1
ENSG00000164543	STK17A	0	0	0	1	0	0	1
ENSG00000203747	FCGR3A	0	0	0	1	0	0	1
ENSG00000126749	EMG1	0	0	0	1	0	0	1
ENSG00000235750	KIAA0040	0	0	0	1	0	0	1
ENSG00000140280	LYSMD2	0	0	0	1	0	0	1
ENSG00000171791	BCL2	0	0	0	1	0	0	1
ENSG00000205056	RP11-693J15.5	0	0	0	1	0	0	1
ENSG00000134061	CD180	0	0	0	1	0	0	1
ENSG00000124882	EREG	0	0	0	0	0	1	1
ENSG00000169403	PTAFR	0	0	0	0	0	1	1
ENSG00000165801	ARHGEF40	0	0	0	0	0	1	1
ENSG00000137801	THBS1	0	0	0	0	0	1	1
ENSG00000002933	TMEM176A	0	0	0	0	0	1	1
ENSG00000237541	HLA-DQA2	0	0	0	1	0	0	1
ENSG00000004799	PDK4	0	0	0	0	0	1	1
ENSG00000132475	H3F3B	1	0	0	0	0	0	1
ENSG00000132002	DNAJB1	1	0	0	0	0	0	1
ENSG00000144746	ARL6IP5	1	0	0	0	0	0	1
ENSG00000179144	GIMAP7	1	0	0	0	0	0	1
ENSG00000168685	IL7R	1	0	0	0	0	0	1
ENSG00000164691	TAGAP	1	0	0	0	0	0	1
ENSG00000271869	RP11-51J9.5	1	0	0	0	0	0	1
ENSG00000163191	S100A11	1	0	0	0	0	0	1
ENSG00000104660	LEPROTL1	1	0	0	0	0	0	1
ENSG00000185697	MYBL1	1	0	0	0	0	0	1
ENSG00000139679	LPAR6	1	0	0	0	0	0	1
ENSG00000159388	BTG2	1	0	0	0	0	0	1
ENSG00000174748	RPL15	1	0	0	0	0	0	1
ENSG00000113811	SELK	1	0	0	0	0	0	1
ENSG00000100906	NFKBIA	1	0	0	0	0	0	1
ENSG00000163519	TRAT1	1	0	0	0	0	0	1
ENSG00000160908	ZNF394	1	0	0	0	0	0	1
ENSG00000100100	PIK3IP1	1	0	0	0	0	0	1
ENSG00000245954	RP11-18H21.1	1	0	0	0	0	0	1
ENSG00000100201	DDX17	1	0	0	0	0	0	1
ENSG00000246067	RAB30-AS1	1	0	0	0	0	0	1
ENSG00000117318	ID3	1	0	0	0	0	0	1
ENSG00000117523	PRRC2C	1	0	0	0	0	0	1
ENSG00000078589	P2RY10	1	0	0	0	0	0	1
ENSG00000155366	RHOC	1	0	0	0	0	0	1
ENSG00000076053	RBM7	1	0	0	0	0	0	1
ENSG00000172115	CYCS	1	0	0	0	0	0	1
ENSG00000069509	FUNDC1	1	0	0	0	0	0	1
ENSG00000167996	FTH1	1	0	0	0	0	0	1
ENSG00000211679	IGLC3	1	0	0	0	0	0	1
ENSG00000198771	RCSD1	1	0	0	0	0	0	1
ENSG00000150991	UBC	1	0	0	0	0	0	1
ENSG00000126524	SBDS	1	0	0	0	0	0	1
ENSG00000163221	S100A12	1	0	0	0	0	0	1
ENSG00000257815	LINC01481	1	0	0	0	0	0	1
ENSG00000227507	LTB	1	0	0	0	0	0	1
ENSG00000139641	ESYT1	1	0	0	0	0	0	1
ENSG00000113838	TBCCD1	1	0	0	0	0	0	1
ENSG00000115652	UXS1	1	0	0	0	0	0	1
ENSG00000102760	RGCC	1	0	0	0	0	0	1
ENSG00000161654	LSM12	1	0	0	0	0	0	1
ENSG00000110876	SELPLG	1	0	0	0	0	0	1
ENSG00000140988	RPS2	1	0	0	0	0	0	1
ENSG00000119965	C10orf88	1	0	0	0	0	0	1
ENSG00000115806	GORASP2	1	0	0	0	0	0	1
ENSG00000167658	EEF2	1	0	0	0	0	0	1
ENSG00000110367	DDX6	1	0	0	0	0	0	1
ENSG00000181274	FRAT2	1	0	0	0	0	0	1
ENSG00000187118	CMC1	1	0	0	0	0	0	1
ENSG00000111011	RSRC2	1	0	0	0	0	0	1
ENSG00000182853	VMO1	1	0	0	0	0	0	1
ENSG00000132646	PCNA	1	0	0	0	0	0	1
ENSG00000106603	COA1	1	0	0	0	0	0	1
ENSG00000197353	LYPD2	1	0	0	0	0	0	1
ENSG00000074800	ENO1	1	0	0	0	0	0	1
ENSG00000138382	METTL5	1	0	0	0	0	0	1
ENSG00000141682	PMAIP1	1	0	0	0	0	0	1
ENSG00000211895	IGHA1	1	0	0	0	0	0	1
ENSG00000069493	CLEC2D	1	0	0	0	0	0	1
ENSG00000147403	RPL10	1	0	0	0	0	0	1
ENSG00000205268	PDE7A	1	0	0	0	0	0	1
ENSG00000272211	RP11-347P5.1	1	0	0	0	0	0	1
ENSG00000171161	ZNF672	1	0	0	0	0	0	1
ENSG00000148824	MTG1	1	0	0	0	0	0	1
ENSG00000171476	HOPX	1	0	0	0	0	0	1
ENSG00000145391	SETD7	1	0	0	0	0	0	1
ENSG00000211890	IGHA2	1	0	0	0	0	0	1

## Sheet: Table S5
Table S5. Differentially expressed genes affacted by THC in CD4+ T-cells
Ensembl ID	Gene	t-statistic	P value	FDR
ENSG00000163220	S100A9	-14.4063	4.72046e-47	7.37807e-43
ENSG00000100650	SRSF5	12.934	2.89367e-38	2.2614e-34
ENSG00000115523	GNLY	12.1109	9.24496e-34	4.81663e-30
ENSG00000211592	IGKC	-11.3851	4.9587e-30	1.93761e-26
ENSG00000133639	BTG1	11.3616	6.49108e-30	2.02911e-26
ENSG00000211677	IGLC2	11.3157	1.09724e-29	2.85831e-26
ENSG00000177606	JUN	-10.6775	1.29706e-26	2.89615e-23
ENSG00000105374	NKG7	10.3681	3.46319e-25	6.7662e-22
ENSG00000133574	GIMAP4	10.3215	5.63606e-25	9.78796e-22
ENSG00000143546	S100A8	-10.2168	1.66838e-24	2.60768e-21
ENSG00000090382	LYZ	-8.3164	9.06777e-17	1.28845e-13
ENSG00000100453	GZMB	7.90861	2.60288e-15	3.39025e-12
ENSG00000168209	DDIT4	7.83321	4.75587e-15	5.71802e-12
ENSG00000171858	RPS21	-7.66753	1.75342e-14	1.95756e-11
ENSG00000198786	MT-ND5	-7.51969	5.49049e-14	5.72109e-11
ENSG00000275302	CCL4	7.46505	8.327e-14	8.13444e-11
ENSG00000229117	RPL41	-7.35632	1.89044e-13	1.7381e-10
ENSG00000132475	H3F3B	-7.30785	2.71451e-13	2.3571e-10
ENSG00000205542	TMSB4X	7.22794	4.90371e-13	4.03395e-10
ENSG00000152518	ZFP36L2	6.62624	3.44351e-11	2.6911e-08
ENSG00000173812	EIF1	-6.44558	1.15157e-10	8.571e-08
ENSG00000277734	TRAC	6.43768	1.21311e-10	8.61859e-08
ENSG00000132002	DNAJB1	-6.37889	1.78376e-10	1.16501e-07
ENSG00000130522	JUND	-6.37845	1.78888e-10	1.16501e-07
ENSG00000136997	MYC	6.35289	2.11302e-10	1.32106e-07
ENSG00000115738	ID2	6.3316	2.4263e-10	1.45858e-07
ENSG00000211896	IGHG1	6.19273	5.91298e-10	3.42296e-07
ENSG00000136490	LIMD2	6.06583	1.31277e-09	7.32805e-07
ENSG00000071073	MGAT4A	-5.9992	1.98293e-09	1.06873e-06
ENSG00000241343	RPL36A	-5.89657	3.71139e-09	1.93363e-06
ENSG00000144746	ARL6IP5	5.76912	7.96862e-09	4.01773e-06
ENSG00000198938	MT-CO3	-5.70506	1.16301e-08	5.68056e-06
ENSG00000179144	GIMAP7	5.66025	1.51154e-08	7.13034e-06
ENSG00000057657	PRDM1	5.65582	1.55107e-08	7.13034e-06
ENSG00000168685	IL7R	5.5926	2.23699e-08	9.98974e-06
ENSG00000101608	MYL12A	5.58447	2.34417e-08	1.01776e-05
ENSG00000126353	CCR7	5.48793	4.06661e-08	1.71787e-05
ENSG00000219200	RNASEK	5.40473	6.49072e-08	2.66974e-05
ENSG00000164691	TAGAP	5.38142	7.39011e-08	2.96173e-05
ENSG00000034510	TMSB10	-5.37606	7.61346e-08	2.97496e-05
ENSG00000133321	RARRES3	5.35719	8.45249e-08	3.22225e-05
ENSG00000204261	PSMB8-AS1	5.34014	9.28735e-08	3.45622e-05
ENSG00000271869	RP11-51J9.5	-5.33315	9.6522e-08	3.50846e-05
ENSG00000265972	TXNIP	5.26159	1.42816e-07	5.07323e-05
ENSG00000173113	TRMT112	5.25436	1.48541e-07	5.15933e-05
ENSG00000163191	S100A11	5.21884	1.80043e-07	6.11755e-05
ENSG00000104660	LEPROTL1	-5.20772	1.91175e-07	6.35758e-05
ENSG00000185697	MYBL1	5.08798	3.61903e-07	0.000117845
ENSG00000118503	TNFAIP3	-4.98593	6.16643e-07	0.000196696
ENSG00000139679	LPAR6	4.8783	1.07007e-06	0.000334503
ENSG00000175567	UCP2	4.83994	1.2988e-06	0.000398043
ENSG00000159388	BTG2	-4.79212	1.6503e-06	0.000496043
ENSG00000174748	RPL15	-4.78031	1.75027e-06	0.000516166
ENSG00000085265	FCN1	-4.70478	2.54134e-06	0.000735576
ENSG00000134333	LDHA	-4.68752	2.76539e-06	0.000783021
ENSG00000113811	SELK	-4.68457	2.80545e-06	0.000783021
ENSG00000100906	NFKBIA	-4.66965	3.01711e-06	0.000827322
ENSG00000257764	RP11-1143G9.4	-4.64182	3.45353e-06	0.000930668
ENSG00000163519	TRAT1	4.60557	4.11339e-06	0.0010897
ENSG00000198712	MT-CO2	-4.5569	5.19137e-06	0.00135235
ENSG00000160908	ZNF394	-4.55272	5.29575e-06	0.00135693
ENSG00000100100	PIK3IP1	4.50916	6.50845e-06	0.00164076
ENSG00000245954	RP11-18H21.1	4.38155	1.17838e-05	0.0029235
ENSG00000100201	DDX17	4.32256	1.54226e-05	0.00376649
ENSG00000268001	CARD8-AS1	4.31254	1.61391e-05	0.00388082
ENSG00000142327	RNPEPL1	-4.28481	1.82895e-05	0.00433128
ENSG00000246067	RAB30-AS1	4.26761	1.97579e-05	0.0046092
ENSG00000117318	ID3	-4.25795	2.06312e-05	0.00474213
ENSG00000117523	PRRC2C	-4.24626	2.17372e-05	0.00485784
ENSG00000272256	RP11-489E7.4	-4.24606	2.17562e-05	0.00485784
ENSG00000127528	KLF2	-4.23189	2.31731e-05	0.00510135
ENSG00000078589	P2RY10	-4.19398	2.74098e-05	0.00595022
ENSG00000155366	RHOC	4.19053	2.78306e-05	0.0059588
ENSG00000076053	RBM7	-4.18388	2.86581e-05	0.00605305
ENSG00000172115	CYCS	-4.17265	3.01083e-05	0.00627457
ENSG00000157978	LDLRAP1	4.15	3.32472e-05	0.00683756
ENSG00000069509	FUNDC1	4.1201	3.78713e-05	0.00768739
ENSG00000167996	FTH1	-4.10224	4.09164e-05	0.00819903
ENSG00000211679	IGLC3	4.09825	4.16278e-05	0.00823597
ENSG00000198771	RCSD1	4.09333	4.2523e-05	0.00830794
ENSG00000150991	UBC	-4.08976	4.31823e-05	0.00833258
ENSG00000163041	H3F3A	4.07695	4.56301e-05	0.00869754
ENSG00000126524	SBDS	-4.0117	6.02834e-05	0.0113522
ENSG00000163221	S100A12	-4.00864	6.10682e-05	0.011363
ENSG00000257815	LINC01481	-3.99707	6.41326e-05	0.0117929
ENSG00000227507	LTB	3.99259	6.53567e-05	0.0118656
ENSG00000137441	FGFBP2	3.9901	6.60464e-05	0.0118656
ENSG00000067225	PKM	-3.97657	6.99159e-05	0.0123321
ENSG00000139641	ESYT1	3.97554	7.02211e-05	0.0123321
ENSG00000113838	TBCCD1	3.94391	8.01624e-05	0.0139215
ENSG00000145391	SETD7	-3.93478	8.32715e-05	0.0143026
ENSG00000115652	UXS1	3.89231	9.92954e-05	0.0166999
ENSG00000102760	RGCC	3.89213	9.93662e-05	0.0166999
ENSG00000125910	S1PR4	3.869	0.000109284	0.0181714
ENSG00000100097	LGALS1	-3.83093	0.000127662	0.0210038
ENSG00000161654	LSM12	-3.81612	0.000135568	0.0220722
ENSG00000182899	RPL35A	-3.78679	0.000152608	0.0245904
ENSG00000110876	SELPLG	3.76706	0.000165182	0.0263449
ENSG00000140988	RPS2	-3.74922	0.000177388	0.0280058
ENSG00000119965	C10orf88	3.73856	0.000185074	0.0288208
ENSG00000115806	GORASP2	3.73699	0.000186238	0.0288208
ENSG00000167658	EEF2	-3.7345	0.00018809	0.028822
ENSG00000110367	DDX6	-3.72631	0.000194305	0.0291212
ENSG00000181274	FRAT2	-3.7254	0.000195006	0.0291212
ENSG00000109906	ZBTB16	-3.72459	0.000195632	0.0291212
ENSG00000187118	CMC1	3.70488	0.000211487	0.0311844
ENSG00000111011	RSRC2	3.69739	0.000217828	0.0318192
ENSG00000067082	KLF6	3.67755	0.000235484	0.0340797
ENSG00000182853	VMO1	3.67066	0.000241925	0.0346584
ENSG00000132646	PCNA	3.66856	0.000243917	0.0346584
ENSG00000211890	IGHA2	-3.63973	0.00027292	0.0384301
ENSG00000211772	TRBC2	3.63078	0.000282563	0.0394326
ENSG00000106603	COA1	3.62778	0.000285874	0.0395416
ENSG00000197353	LYPD2	3.62529	0.000288639	0.0395739
ENSG00000074800	ENO1	-3.62133	0.000293098	0.0398358
ENSG00000138382	METTL5	3.6118	0.000304084	0.0409727
ENSG00000141682	PMAIP1	-3.60511	0.000312021	0.0416828
ENSG00000116679	IVNS1ABP	3.60184	0.000315977	0.0418535
ENSG00000211895	IGHA1	-3.59424	0.000325341	0.0424271
ENSG00000069493	CLEC2D	3.59179	0.000328413	0.0424271
ENSG00000147403	RPL10	-3.59062	0.000329891	0.0424271
ENSG00000205268	PDE7A	3.58962	0.000331165	0.0424271
ENSG00000272211	RP11-347P5.1	3.58388	0.000338534	0.0430186
ENSG00000171161	ZNF672	3.56751	0.000360395	0.0454273
ENSG00000148824	MTG1	3.56021	0.000370562	0.046335
ENSG00000171476	HOPX	3.54648	0.000390411	0.0484295

## Sheet: Table S6
Table S6. Differentially expressed genes affacted by THC in IL7RCD4+ T-cells
Ensembl ID	Gene	t-statistic	P value	FDR
ENSG00000133639	BTG1	9.72545	2.34857e-22	2.95708e-18
ENSG00000115523	GNLY	8.1688	3.1147e-16	1.96086e-12
ENSG00000133574	GIMAP4	6.81816	9.22168e-12	3.87034e-08
ENSG00000211677	IGLC2	6.72281	1.78258e-11	5.61111e-08
ENSG00000205542	TMSB4X	6.51245	7.39331e-11	1.86178e-07
ENSG00000163220	S100A9	-6.36895	1.90321e-10	3.99389e-07
ENSG00000071073	MGAT4A	-5.6308	1.79371e-08	3.22638e-05
ENSG00000034510	TMSB10	-5.35789	8.41978e-08	0.000118966
ENSG00000198786	MT-ND5	-5.3561	8.50364e-08	0.000118966
ENSG00000100650	SRSF5	5.14015	2.74516e-07	0.000345644
ENSG00000126353	CCR7	4.8564	1.19541e-06	0.00136831
ENSG00000211592	IGKC	-4.74258	2.11013e-06	0.00221405
ENSG00000175567	UCP2	4.68878	2.74844e-06	0.00266197
ENSG00000168209	DDIT4	4.57859	4.68128e-06	0.00421014
ENSG00000273338	RP11-386I14.4	-4.54389	5.52249e-06	0.00463558
ENSG00000171858	RPS21	-4.46188	8.12447e-06	0.00630563
ENSG00000229117	RPL41	-4.44419	8.82229e-06	0.00630563
ENSG00000136997	MYC	4.43956	9.01448e-06	0.00630563
ENSG00000183291	SEP15	4.4255	9.62175e-06	0.00637618
ENSG00000105374	NKG7	4.32564	1.52088e-05	0.00957471
ENSG00000265681	RPL17	4.31292	1.61111e-05	0.00965978
ENSG00000143811	PYCR2	4.29758	1.72675e-05	0.00988248
ENSG00000136490	LIMD2	4.28011	1.86802e-05	0.0102262
ENSG00000173221	GLRX	4.24513	2.18468e-05	0.0110685
ENSG00000138795	LEF1	4.24053	2.22997e-05	0.0110685
ENSG00000159720	ATP6V0D1	4.23499	2.28561e-05	0.0110685
ENSG00000143546	S100A8	-4.21654	2.4808e-05	0.0112339
ENSG00000108654	DDX5	4.20785	2.57807e-05	0.0112339
ENSG00000163041	H3F3A	4.20703	2.58743e-05	0.0112339
ENSG00000204264	PSMB8	4.19256	2.75823e-05	0.0115763
ENSG00000173114	LRRN3	4.1783	2.93695e-05	0.0119287
ENSG00000213203	GIMAP1	4.16357	3.1331e-05	0.0123278
ENSG00000118503	TNFAIP3	-3.99718	6.41023e-05	0.0244579
ENSG00000173812	EIF1	-3.97708	6.9768e-05	0.0258367
ENSG00000115738	ID2	3.93105	8.45772e-05	0.0304261
ENSG00000265972	TXNIP	3.91498	9.04105e-05	0.0316211
ENSG00000162894	FCMR	3.87822	0.000105224	0.0358074
ENSG00000177606	JUN	-3.86247	0.000112244	0.0366564
ENSG00000140092	FBLN5	3.85967	0.000113541	0.0366564
ENSG00000157978	LDLRAP1	3.80608	0.000141189	0.0444429
ENSG00000054282	SDCCAG8	3.78283	0.000155056	0.0476174

## Sheet: Table S7
Table S7. Differentially expressed genes affacted by THC in CD8+ T-cells
Ensembl ID	Gene	t-statistic	P value	FDR
ENSG00000133639	BTG1	11.2538	2.21835e-29	3.13075e-25
ENSG00000163220	S100A9	-10.5388	5.72179e-26	4.03758e-22
ENSG00000152518	ZFP36L2	10.3652	3.57076e-25	1.6798e-21
ENSG00000168209	DDIT4	10.2319	1.42678e-24	5.03403e-21
ENSG00000143546	S100A8	-9.95801	2.32675e-23	6.5675e-20
ENSG00000241343	RPL36A	-8.76834	1.81316e-18	4.26485e-15
ENSG00000211677	IGLC2	8.20549	2.29645e-16	4.62997e-13
ENSG00000229117	RPL41	-7.76764	7.99603e-15	1.4106e-11
ENSG00000171858	RPS21	-7.1566	8.27032e-13	1.29688e-09
ENSG00000128016	ZFP36	6.97592	3.03878e-12	4.28863e-09
ENSG00000115738	ID2	6.7007	2.07429e-11	2.66132e-08
ENSG00000198938	MT-CO3	-6.64446	3.04339e-11	3.57928e-08
ENSG00000198786	MT-ND5	-6.19138	5.96384e-10	6.47443e-07
ENSG00000121966	CXCR4	5.91577	3.30336e-09	3.33002e-06
ENSG00000171223	JUNB	5.71861	1.07401e-08	1.0105e-05
ENSG00000100650	SRSF5	5.69283	1.24952e-08	1.10215e-05
ENSG00000057657	PRDM1	5.60717	2.05666e-08	1.70739e-05
ENSG00000142327	RNPEPL1	-5.54303	2.97288e-08	2.3309e-05
ENSG00000211772	TRBC2	5.48714	4.08494e-08	3.03425e-05
ENSG00000125347	IRF1	-5.35214	8.69182e-08	6.13339e-05
ENSG00000133574	GIMAP4	5.28546	1.25388e-07	8.42666e-05
ENSG00000133321	RARRES3	5.26807	1.37863e-07	8.84394e-05
ENSG00000266402	SNHG25	-5.17256	2.30909e-07	0.000141688
ENSG00000206503	HLA-A	5.16112	2.45476e-07	0.00014435
ENSG00000219200	RNASEK	5.11043	3.21425e-07	0.000181451
ENSG00000090382	LYZ	-5.09726	3.44602e-07	0.000187052
ENSG00000008517	IL32	4.89949	9.60858e-07	0.000502244
ENSG00000127528	KLF2	-4.8447	1.26801e-06	0.000639124
ENSG00000275302	CCL4	4.76527	1.88602e-06	0.000917844
ENSG00000211896	IGHG1	4.73801	2.15824e-06	0.00101531
ENSG00000144426	NBEAL1	4.5971	4.2842e-06	0.00195042
ENSG00000213741	RPS29	-4.55901	5.13965e-06	0.00226675
ENSG00000170345	FOS	-4.53423	5.78147e-06	0.00247254
ENSG00000211592	IGKC	-4.52342	6.08495e-06	0.00252579
ENSG00000157514	TSC22D3	4.49077	7.0967e-06	0.00286159
ENSG00000272009	RP1-313I6.12	-4.42491	9.64844e-06	0.00378246
ENSG00000175567	UCP2	4.41025	1.03254e-05	0.00393843
ENSG00000198763	MT-ND2	-4.29542	1.74362e-05	0.0064757
ENSG00000118680	MYL12B	4.27176	1.93934e-05	0.00701794
ENSG00000185338	SOCS1	4.20568	2.603e-05	0.00909584
ENSG00000257764	RP11-1143G9.4	-4.20228	2.64245e-05	0.00909584
ENSG00000085265	FCN1	-4.16381	3.12977e-05	0.0105168
ENSG00000102879	CORO1A	4.15827	3.2067e-05	0.0105247
ENSG00000183918	SH2D1A	4.08859	4.34e-05	0.0139206
ENSG00000180389	ATP5EP2	-4.05659	4.9794e-05	0.0156165
ENSG00000162894	FCMR	3.97263	7.10847e-05	0.0218091
ENSG00000026025	VIM	-3.89109	9.97968e-05	0.0299666
ENSG00000272047	GTF2H5	3.87677	0.000105851	0.0311223
ENSG00000067225	PKM	-3.85082	0.000117722	0.0339063
ENSG00000205542	TMSB4X	3.84125	0.000122412	0.0345519
ENSG00000177954	RPS27	-3.82063	0.000133111	0.0368352
ENSG00000198712	MT-CO2	-3.80726	0.000140517	0.0381369
ENSG00000151500	THYN1	3.75978	0.000170063	0.0452849
ENSG00000112081	SRSF3	-3.74627	0.00017948	0.0469016
ENSG00000136490	LIMD2	3.7417	0.000182781	0.0469016
ENSG00000169733	RFNG	-3.72275	0.000197063	0.0496634

## Sheet: Table S8
Table S8. Differentially expressed genes affacted by THC in B cells
Ensembl ID	Gene	t-statistic	P value	FDR
ENSG00000115523	GNLY	10.7388	6.69008e-27	9.15337e-23
ENSG00000100650	SRSF5	9.30507	1.33907e-20	9.16059e-17
ENSG00000105374	NKG7	7.55932	4.05197e-14	1.84797e-10
ENSG00000196735	HLA-DQA1	6.51345	7.3443e-11	2.51212e-07
ENSG00000205056	RP11-693J15.5	6.37542	1.82461e-10	4.99285e-07
ENSG00000162894	FCMR	6.26516	3.72443e-10	8.49294e-07
ENSG00000128218	VPREB3	6.12136	9.27827e-10	1.8135e-06
ENSG00000112149	CD83	-6.00014	1.9715e-09	3.15919e-06
ENSG00000187514	PTMA	-5.99158	2.07811e-09	3.15919e-06
ENSG00000275302	CCL4	5.86979	4.36356e-09	5.97023e-06
ENSG00000168209	DDIT4	5.6779	1.3636e-08	1.69606e-05
ENSG00000171223	JUNB	5.56247	2.65978e-08	2.94177e-05
ENSG00000125910	S1PR4	5.55381	2.79514e-08	2.94177e-05
ENSG00000143933	CALM2	5.53654	3.08511e-08	3.01504e-05
ENSG00000034510	TMSB10	-5.51606	3.46689e-08	3.16227e-05
ENSG00000079950	STX7	5.07045	3.96885e-07	0.000339386
ENSG00000113732	ATP6V0E1	5.04433	4.55121e-07	0.000356358
ENSG00000101608	MYL12A	5.03865	4.68824e-07	0.000356358
ENSG00000120129	DUSP1	5.0241	5.05805e-07	0.000364233
ENSG00000175567	UCP2	4.91599	8.83359e-07	0.000604306
ENSG00000198840	MT-ND3	4.86852	1.12436e-06	0.00072911
ENSG00000111679	PTPN6	4.86025	1.17237e-06	0.00072911
ENSG00000168288	MMADHC	4.80879	1.51849e-06	0.000903304
ENSG00000163220	S100A9	-4.64924	3.33166e-06	0.00189932
ENSG00000217128	FNIP1	-4.62361	3.77112e-06	0.00205407
ENSG00000112576	CCND3	-4.61646	3.90336e-06	0.00205407
ENSG00000152518	ZFP36L2	4.59102	4.41093e-06	0.0022352
ENSG00000115541	HSPE1	4.57422	4.7799e-06	0.00233567
ENSG00000168291	PDHB	4.53794	5.68052e-06	0.00263151
ENSG00000090266	NDUFB2	4.53465	5.77002e-06	0.00263151
ENSG00000100453	GZMB	4.49064	7.1009e-06	0.00313402
ENSG00000134061	CD180	4.4724	7.73462e-06	0.00330704
ENSG00000198408	MGEA5	4.44345	8.85271e-06	0.00363947
ENSG00000109906	ZBTB16	-4.43885	9.04414e-06	0.00363947
ENSG00000143612	C1orf43	4.4325	9.31474e-06	0.00364126
ENSG00000130348	QRSL1	4.40842	1.04129e-05	0.00395748
ENSG00000144579	CTDSP1	4.36582	1.26646e-05	0.00468317
ENSG00000178127	NDUFV2	4.34116	1.41733e-05	0.00510314
ENSG00000163041	H3F3A	4.30743	1.65161e-05	0.00579418
ENSG00000152492	CCDC50	4.26716	1.97975e-05	0.00677173
ENSG00000000938	FGR	4.25958	2.04815e-05	0.00683483
ENSG00000177971	IMP3	4.20889	2.5663e-05	0.00824606
ENSG00000129968	ABHD17A	4.20667	2.59159e-05	0.00824606
ENSG00000198843	SELT	4.18786	2.81597e-05	0.00875639
ENSG00000115758	ODC1	4.17365	2.99764e-05	0.00911415
ENSG00000249915	PDCD6	4.15827	3.20674e-05	0.00953795
ENSG00000162511	LAPTM5	-4.11972	3.79331e-05	0.0110426
ENSG00000136527	TRA2B	-4.10681	4.01154e-05	0.0114346
ENSG00000175197	DDIT3	-4.08986	4.31639e-05	0.0120524
ENSG00000265972	TXNIP	-4.07967	4.50993e-05	0.012341
ENSG00000143546	S100A8	-4.05419	5.03076e-05	0.0132979
ENSG00000172172	MRPL13	4.05311	5.05404e-05	0.0132979
ENSG00000237541	HLA-DQA2	4.03449	5.47211e-05	0.0141263
ENSG00000268001	CARD8-AS1	4.0254	5.68795e-05	0.0144116
ENSG00000082515	MRPL22	4.00023	6.32803e-05	0.0155944
ENSG00000145416	MARCH1	3.9976	6.39867e-05	0.0155944
ENSG00000156304	SCAF4	-3.994	6.49672e-05	0.0155944
ENSG00000120963	ZNF706	3.97639	6.99685e-05	0.0165053
ENSG00000163565	IFI16	3.96076	7.47101e-05	0.0172148
ENSG00000187531	SIRT7	3.95828	7.54924e-05	0.0172148
ENSG00000173409	ARV1	3.94339	8.03371e-05	0.0178361
ENSG00000232629	HLA-DQB2	3.94194	8.08241e-05	0.0178361
ENSG00000164751	PEX2	3.90611	9.37933e-05	0.0203695
ENSG00000137441	FGFBP2	3.89928	9.64777e-05	0.0206251
ENSG00000170906	NDUFA3	3.87021	0.000108742	0.0228893
ENSG00000204261	PSMB8-AS1	3.86517	0.000111011	0.0230129
ENSG00000204264	PSMB8	3.85478	0.000115834	0.0236543
ENSG00000156928	MALSU1	3.82299	0.000131843	0.0265277
ENSG00000169230	PRELID1	3.81417	0.000136642	0.0270948
ENSG00000160856	FCRL3	3.81031	0.000138791	0.0271277
ENSG00000115091	ACTR3	3.79451	0.000147938	0.0281081
ENSG00000272047	GTF2H5	3.79189	0.000149504	0.0281081
ENSG00000206503	HLA-A	3.78952	0.000150941	0.0281081
ENSG00000185088	RPS27L	3.78774	0.000152025	0.0281081
ENSG00000205542	TMSB4X	3.77437	0.000160416	0.0292641
ENSG00000159674	SPON2	3.77055	0.000162888	0.0293242
ENSG00000143149	ALDH9A1	3.76542	0.000166271	0.0295445
ENSG00000211899	IGHM	-3.74463	0.000180659	0.0316357
ENSG00000182899	RPL35A	-3.74186	0.000182665	0.0316357
ENSG00000100387	RBX1	3.73264	0.00018948	0.0324059
ENSG00000101596	SMCHD1	-3.72918	0.000192106	0.0324493
ENSG00000213145	CRIP1	3.72244	0.000197304	0.0329209
ENSG00000121858	TNFSF10	3.70542	0.00021104	0.0344071
ENSG00000177409	SAMD9L	3.70518	0.000211241	0.0344071
ENSG00000165650	PDZD8	3.68535	0.000228388	0.0367624
ENSG00000272398	CD24	3.6809	0.00023241	0.0369748
ENSG00000156976	EIF4A2	3.67605	0.000236876	0.0372521
ENSG00000136213	CHST12	3.67082	0.000241769	0.0375897
ENSG00000265206	RP5-1171I10.5	3.65715	0.000255034	0.0392065
ENSG00000092330	TINF2	3.65106	0.000261162	0.0397024
ENSG00000247982	LINC00926	3.64522	0.000267159	0.0401678
ENSG00000135046	ANXA1	3.62951	0.000283958	0.0420607
ENSG00000164543	STK17A	3.62775	0.000285897	0.0420607
ENSG00000203747	FCGR3A	3.62388	0.000290214	0.0422416
ENSG00000126749	EMG1	3.61388	0.000301654	0.0434446
ENSG00000235750	KIAA0040	3.60211	0.000315649	0.0449865
ENSG00000140280	LYSMD2	3.57757	0.00034681	0.0489181
ENSG00000173113	TRMT112	3.57115	0.000355423	0.0495304
ENSG00000171791	BCL2	-3.56897	0.000358392	0.0495304

## Sheet: Table S9
Table S9. Differentially expressed genes affacted by THC in natural killer cells
Ensembl ID	Gene	t-statistic	P value	FDR
ENSG00000168209	DDIT4	12.4645	1.16538e-35	1.52012e-31
ENSG00000275302	CCL4	10.0431	9.85034e-24	6.42439e-20
ENSG00000152518	ZFP36L2	9.68835	3.37942e-22	1.46937e-18
ENSG00000133639	BTG1	9.36722	7.44649e-21	2.4283e-17
ENSG00000171223	JUNB	8.0704	7.00707e-16	1.828e-12
ENSG00000211592	IGKC	-7.41627	1.20467e-13	2.61895e-10
ENSG00000128016	ZFP36	6.45341	1.09361e-10	2.03786e-07
ENSG00000100453	GZMB	6.33083	2.43847e-10	3.97592e-07
ENSG00000175040	CHST2	5.89123	3.83334e-09	5.55579e-06
ENSG00000087074	PPP1R15A	-5.81868	5.93132e-09	7.73681e-06
ENSG00000198763	MT-ND2	-5.751	8.87179e-09	1.05203e-05
ENSG00000143546	S100A8	-5.58798	2.29728e-08	2.49714e-05
ENSG00000198786	MT-ND5	-5.49215	3.9708e-08	3.98424e-05
ENSG00000211677	IGLC2	5.44682	5.12772e-08	4.77757e-05
ENSG00000177606	JUN	-5.37154	7.80689e-08	6.78887e-05
ENSG00000115738	ID2	5.22219	1.76824e-07	0.000144156
ENSG00000172543	CTSW	-5.08773	3.62381e-07	0.000278053
ENSG00000163220	S100A9	-5.06079	4.17527e-07	0.000302568
ENSG00000163466	ARPC2	4.79889	1.5955e-06	0.00109535
ENSG00000181036	FCRL6	4.59711	4.28396e-06	0.002794
ENSG00000143119	CD53	-4.57731	4.7099e-06	0.00292552
ENSG00000138767	CNOT6L	4.45229	8.49583e-06	0.00495158
ENSG00000198938	MT-CO3	-4.44643	8.73094e-06	0.00495158
ENSG00000172331	BPGM	4.40579	1.054e-05	0.00566694
ENSG00000172216	CEBPB	4.39928	1.08612e-05	0.00566694
ENSG00000136490	LIMD2	4.3459	1.38708e-05	0.00695889
ENSG00000095794	CREM	4.23535	2.28193e-05	0.0110242
ENSG00000187514	PTMA	-4.1974	2.69991e-05	0.012198
ENSG00000026508	CD44	-4.1964	2.7119e-05	0.012198
ENSG00000160932	LY6E	-4.17622	2.96399e-05	0.0128874
ENSG00000197746	PSAP	-3.87862	0.000105052	0.0430584
ENSG00000272256	RP11-489E7.4	-3.87728	0.000105632	0.0430584
ENSG00000096384	HSP90AB1	-3.86719	0.000110095	0.0435176
ENSG00000067082	KLF6	-3.83081	0.00012772	0.0489993

[truncated: 24 more sheets: Table S10, Table S11, Table S12, Table S13, Table S14, Table S15, Table S16, Table S17, Table S18, Table S19, Table S20, Table S21, Table S22, Table S23, Table S24, Table S25, Table S26, Table S27, Table S28, Table S29 …]
